# Supplementary material
Source: Springer Nature journal article supplement (https://www.springermedizin.de/resource/supplementary/13229_2014_130_MOESM11_ESM.pdf/9676242)
Supplement: MOESM11 [file 9676242]

## Scene type 1

1a

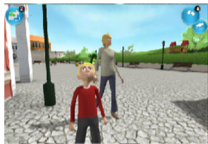

1b

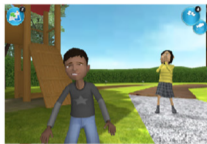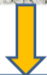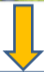

## Scene type 2

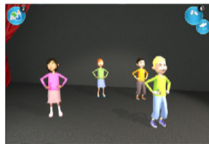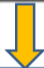

## Scene type 3

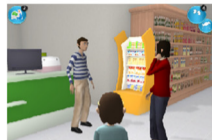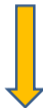

The same action = fall . But the context is different.

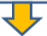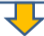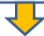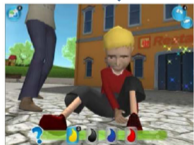

Recognize the emotion in context

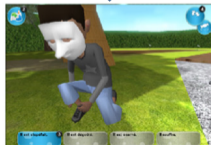

Deduce the emotion with context

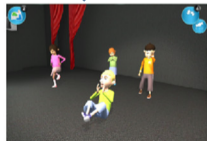

Recognize the emotion in context with special detail

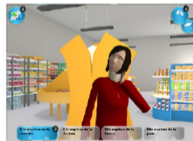

Recognize the emotion after discussion
